# Supplementary material for: Identification of a molecular marker associated with lignotuber in Eucalyptus ssp
Source: PubMed Central journal article supplement (PMC7046637; doi:10.1038/s41598-020-60308-8), 2020-02-27
Supplement: 41598_2020_60308_MOESM1_ESM.pdf [file 41598_2020_60308_MOESM1_ESM.pdf]

**Identification of a molecular marker associated with lignotuber in *Eucalyptus ssp.***

Tânia M. Bortoloto<sup>1</sup>, Maria C. P. Fuchs-Ferraz<sup>1</sup>, Karine Kettener<sup>1</sup>, Lígia Martins Rubio<sup>1</sup>, Esteban R. González<sup>2</sup>, Izabel C. G. de Souza<sup>2</sup>, Shinitiro Oda<sup>2</sup>, Bruno C. Rossini<sup>1,3\*</sup>, Celso L. Marino<sup>1,3</sup>

<sup>1</sup>Departamento de Genética, Instituto de Biociências, UNESP - Univ Estadual Paulista, R. Prof. Dr. Antônio Celso Wagner Zanin s/n, Botucatu, SP CEP 18618-689, Brazil.

<sup>2</sup>Suzano Papel e Celulose SA, Av. Dr. José Lembo 1010, Itapetininga, SP CEP 18207-780, Brazil.

<sup>3</sup>Instituto de Biotecnologia (IBTEC), UNESP - Univ Estadual Paulista, Alameda das Tecomarias s/n, Botucatu, SP CEP 18607-440, Brazil.

**Supplementary Figure 1.** F2 cross individuals (hybrids of *Eucalyptus grandis* x *E. urophylla*) submitted to hydric and nutrient stress in greenhouse. The evaluation after 12 months showed a 3:1 ratio (with lignotuber ; without lignotuber) as showed by qui-square test.

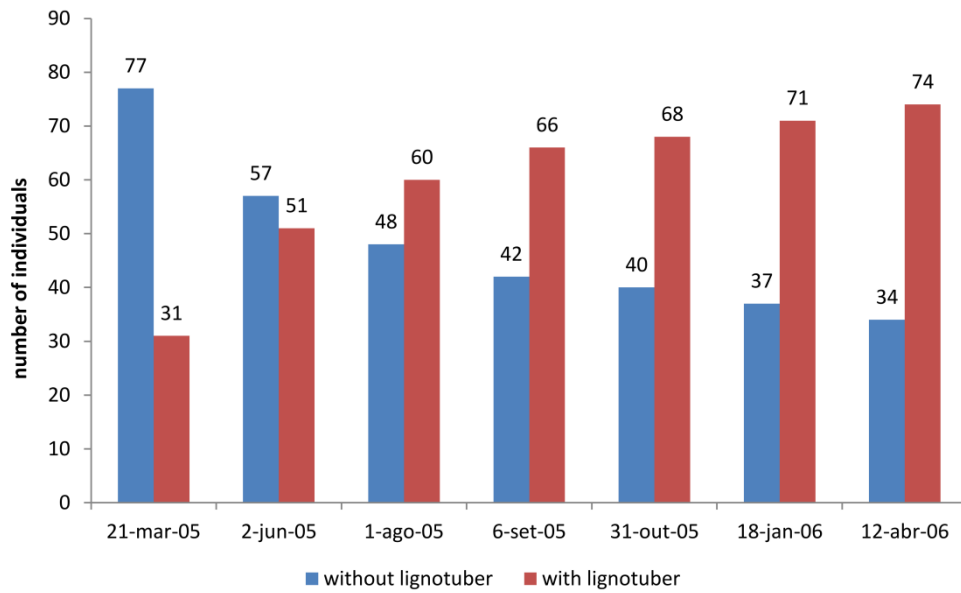



**Supplementary Figure 3.** Southern blot technique with DNA of *E. grandis* (G) and *E. urophylla* (U) digested with restriction enzymes *EcoRI*, *NdeI*, and *XbaI*, showing a single copy of the *ELig* marker in the species.

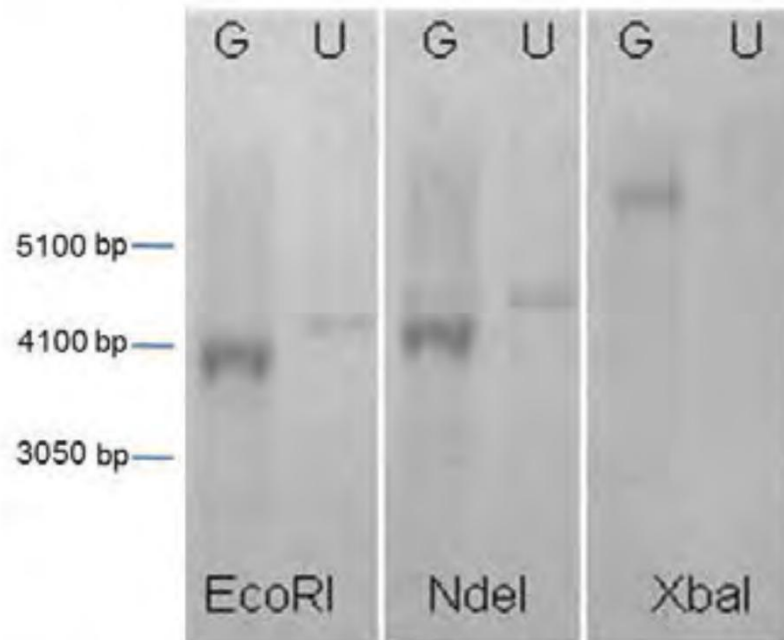







|                              |                                                                                                                                |                                                                                                                                                                       |                                                                                                                                                                                                                                                                          |                                        |                                                                                                                                  |                                                                                                                                                                                                                                                  |                                                        |                                                                                                                                                                                  |
|------------------------------|--------------------------------------------------------------------------------------------------------------------------------|-----------------------------------------------------------------------------------------------------------------------------------------------------------------------|--------------------------------------------------------------------------------------------------------------------------------------------------------------------------------------------------------------------------------------------------------------------------|----------------------------------------|----------------------------------------------------------------------------------------------------------------------------------|--------------------------------------------------------------------------------------------------------------------------------------------------------------------------------------------------------------------------------------------------|--------------------------------------------------------|----------------------------------------------------------------------------------------------------------------------------------------------------------------------------------|
| Eucgr_D00282                 | K03538 - ribonuclease P protein subunit POP4 (POP4, RPP29) (1 of 1) OS=Egrandis                                                | F:GO:0003723;<br>F:GO:0004526;<br>C:GO:0005730;<br>P:GO:0008033;<br>C:GO:0030677;<br>P:GO:0090502                                                                     | F:RNA binding; F:ribonuclease P activity; C:nucleolus; P:RNA processing; C:ribonuclease P complex; P:RNA phosphodiester bond hydrolysis, endonucleolytic                                                                                                                 | EC:3.1.30; EC:3.1.26;<br>EC:3.1.26.5   | Acting on ester bonds;<br>Acting on ester bonds;<br>Ribonuclease P                                                               | no IPS match                                                                                                                                                                                                                                     | no IPS match                                           | no IPS match                                                                                                                                                                     |
| Eucgr_D00284<br>Eucgr_D00285 | PF12937 - F-box-like (F-box-like) (1 of 50) OS=Egrandis<br>uncharacterized protein OS=Egrandis                                 | F:GO:0005515                                                                                                                                                          | F:protein binding                                                                                                                                                                                                                                                        |                                        |                                                                                                                                  | IPR001810 (PFAM);<br>G3DSA:1.20.1280.50 (GENE3D);<br>mobdb-lite (MOBIDB_LITE); mobdb-lite (MOBIDB_LITE); mobdb-lite (MOBIDB_LITE); PTHR1215 (PANTHER); PTHR1215-SF2 (PANTHER); IPR001810 (PROSITE_PROFILES); IPR036047 (SUPERFAMILY)             | F:GO:0005515                                           | F:protein binding                                                                                                                                                                |
| Eucgr_D00286                 | PF12937 - F-box-like (F-box-like) (1 of 50) OS=Egrandis                                                                        | F:GO:0005515                                                                                                                                                          | F:protein binding                                                                                                                                                                                                                                                        |                                        |                                                                                                                                  | no IPS match                                                                                                                                                                                                                                     | no IPS match                                           | no IPS match                                                                                                                                                                     |
| Eucgr_D00287                 | 2.6.1.13 - Ornithine aminotransferase / Ornithine-oxo-acid transaminase (1 of 1) OS=Egrandis                                   | F:GO:0004587;<br>F:GO:0030170;<br>P:GO:005129                                                                                                                         | F:ornithine-oxo-acid transaminase activity; P:pyridoxal phosphate binding; P:L-proline biosynthetic process                                                                                                                                                              | EC:2.6.1.13                            | Ornithine aminotransferase                                                                                                       | no IPS match                                                                                                                                                                                                                                     | no IPS match                                           | no IPS match                                                                                                                                                                     |
| Eucgr_D00288                 | K11517 - (S)-2-hydroxy-acid oxidase (HAO) (1 of 5) OS=Egrandis                                                                 | F:GO:0010181;<br>F:GO:0016491;<br>P:GO:0055114                                                                                                                        | F:FMN binding; F:oxidoreductase activity; P:oxidation-reduction process                                                                                                                                                                                                  |                                        |                                                                                                                                  | no IPS match                                                                                                                                                                                                                                     | no IPS match                                           | no IPS match                                                                                                                                                                     |
| Eucgr_D00289<br>Eucgr_D00290 | PTHR3077-SF17 - PROTEIN TIFY 5A-RELATED (1 of 2) OS=Egrandis<br>uncharacterized protein OS=Egrandis                            |                                                                                                                                                                       |                                                                                                                                                                                                                                                                          |                                        |                                                                                                                                  | mobdb-lite (MOBIDB_LITE); mobdb-lite (MOBIDB_LITE)                                                                                                                                                                                               | no GO terms                                            | no GO terms                                                                                                                                                                      |
| Eucgr_D00291                 | PTHR10543-SF42 - 9-CIS-EPOXYCAROTENOID DIOXYGENASE NCE22, CHLOROPLASTIC-RELATED (1 of 2) OS=Egrandis                           | F:GO:0016702;<br>F:GO:0046872;<br>P:GO:0055114                                                                                                                        | F:oxidoreductase activity, acting on single donors with incorporation of molecular oxygen, incorporation of two atoms of oxygen; F:metal ion binding; P:oxidation-reduction process                                                                                      | EC:1.13.11                             | Acting on single donors with incorporation of molecular oxygen (oxygenases). The oxygen incorporated need not be derived from O2 | IPR004294 (PFAM); mobdb-lite (MOBIDB_LITE); mobdb-lite (MOBIDB_LITE); IPR004294 (PANTHER); PTHR10543-SF42 (PANTHER)                                                                                                                              | F:GO:0016702; P:GO:0055114                             | F:oxidoreductase activity, acting on single donors with incorporation of molecular oxygen, incorporation of two atoms of oxygen; P:oxidation-reduction process                   |
| Eucgr_D00292                 | 2.7.49 - RNA-directed DNA polymerase / Revertase (1 of 28) OS=Egrandis                                                         |                                                                                                                                                                       |                                                                                                                                                                                                                                                                          |                                        |                                                                                                                                  | PTHR34676 (PANTHER);<br>PTHR34676-SF2 (PANTHER)                                                                                                                                                                                                  | no GO terms                                            | no GO terms                                                                                                                                                                      |
| Eucgr_D00293                 | PTHR32227-SF85 - GLYCOSYL HYDROLASES FAMILY PROTEIN (1 of 1) OS=Egrandis                                                       | F:GO:0004553;<br>P:GO:0005975;<br>C:GO:0016021                                                                                                                        | F:hydrolase activity, hydrolyzing O-glycosyl compounds; P:carbohydrate metabolic process; C:integral component of membrane                                                                                                                                               |                                        |                                                                                                                                  | IPR000490 (PFAM); G3DSA:3.20.20.80 (GENE3D); PTHR32227-SF85 (PANTHER); PTHR32227 (PANTHER); IPR017853 (SUPERFAMILY)                                                                                                                              | F:GO:0004553; P:GO:0005975                             | F:hydrolase activity, hydrolyzing O-glycosyl compounds; P:carbohydrate metabolic process                                                                                         |
| Eucgr_D00295                 | K04507 - calycyclin binding protein (CACYBP, SIP) (1 of 1) OS=Egrandis                                                         | F:GO:0008171;<br>P:GO:0032259;<br>F:GO:0046983;<br>F:GO:0005524;<br>C:GO:0005737;<br>C:GO:0005874;<br>F:GO:0008017;<br>F:GO:0008568;<br>P:GO:0016853;<br>P:GO:0051013 | F:O-methyltransferase activity; P:methylation; F:protein dimerization activity                                                                                                                                                                                           |                                        |                                                                                                                                  | mobdb-lite (MOBIDB_LITE)                                                                                                                                                                                                                         | no GO terms                                            | no GO terms                                                                                                                                                                      |
| Eucgr_D00296                 | PTHR23074/PTHR23074-SF92 - AAA ATPase // SUBFAMILY NOT NAMED (1 of 1) OS=Egrandis                                              | F:GO:0008171;<br>P:GO:0032259;<br>F:GO:0046983;<br>F:GO:0005524;<br>C:GO:0005737;<br>C:GO:0005874;<br>F:GO:0008017;<br>F:GO:0008568;<br>P:GO:0016853;<br>P:GO:0051013 | F:ATP binding; C:cytosol; C:microtubule; F:microtubule binding; F:microtubule-severing ATPase activity; F:isomerase activity; P:microtubule severing                                                                                                                     | EC:3.6.1.3; EC:3.6.1.15;<br>EC:3.6.4.3 | Adenosinetriphosphatase; Nucleoside-triphosphate phosphatase; Microtubule-severing ATPase                                        | no IPS match                                                                                                                                                                                                                                     | no IPS match                                           | no IPS match                                                                                                                                                                     |
| Eucgr_D00297                 | PTHR10209-SF171 - GIBBERELLIN 2-BETA-DIOXYGENASE 2-RELATED (1 of 1) OS=Egrandis                                                | F:GO:0016491;<br>F:GO:0046872;<br>P:GO:0055114                                                                                                                        | F:oxidoreductase activity; F:metal ion binding; P:oxidation-reduction process                                                                                                                                                                                            |                                        |                                                                                                                                  | IPR027443 (G3DSA:2.60.120.GENE3D);<br>IPR026992 (PFAM); mobdb-lite (MOBIDB_LITE); PTHR10209 (PANTHER); PTHR10209-SF387 (PANTHER); SSF51197 (SUPERFAMILY)                                                                                         | no GO terms                                            | no GO terms                                                                                                                                                                      |
| Eucgr_D00298                 | PTHR11742-SF7 - ENDOPLASMIC RETICULUM MANNOSYL-OLIGOSACCHARIDE 1,2-ALPHA-MANNOSIDASE (1 of 1) OS=Egrandis                      | F:GO:0004571;<br>F:GO:0005509;<br>P:GO:0008152;<br>C:GO:0016021                                                                                                       | F:mannosyl-oligosaccharide 1,2-alpha-mannosidase activity; F:calcium ion binding; P:metabolic process; C:integral component of membrane                                                                                                                                  | EC:3.2.1.113; EC:3.2.1.24              | Mannosyl-oligosaccharide 1,2-alpha-mannosidase; Alpha-mannosidase                                                                | IPR001382 (PRINTS); IPR001382 (PFAM); IPR012341 (G3DSA:1.50.10.GENE3D); mobdb-lite (MOBIDB_LITE); mobdb-lite (MOBIDB_LITE); PTHR11742-SF55 (PANTHER); PTHR11742 (PANTHER); IPR036026 (SUPERFAMILY)                                               | F:GO:0003824; F:GO:0004571; F:GO:0005509; C:GO:0016020 | F:catalytic activity; F:mannosyl-oligosaccharide 1,2-alpha-mannosidase activity; F:calcium ion binding; C:membrane                                                               |
| Eucgr_D00299                 | PTHR22792-SF58 - LA-RELATED PROTEIN 6A (1 of 1) OS=Egrandis                                                                    | F:GO:0003723;<br>C:GO:0005634;<br>P:GO:0006396;<br>C:GO:1990994                                                                                                       | F:RNA binding; C:nucleus; P:RNA processing; C:ribonucleoprotein complex                                                                                                                                                                                                  |                                        |                                                                                                                                  | mobdb-lite (MOBIDB_LITE); mobdb-lite (MOBIDB_LITE); mobdb-lite (MOBIDB_LITE)                                                                                                                                                                     | no GO terms                                            | no GO terms                                                                                                                                                                      |
| Eucgr_D00300                 | 2.7.8.13 - Phospho-N-acetylmuramoyl-pentapeptide-transferase / UDP-MurNAc-pentapeptide phosphotransferase (1 of 1) OS=Egrandis | F:GO:0008963;<br>C:GO:0016021                                                                                                                                         | F:phospho-N-acetylmuramoyl-pentapeptide-transferase activity; C:integral component of membrane                                                                                                                                                                           | EC:2.7.8.13                            | Phospho-N-acetylmuramoyl-pentapeptide-transferase                                                                                | IPR000715 (PANTHER);<br>PTHR22926-SF8 (PANTHER)                                                                                                                                                                                                  | F:GO:0008963; C:GO:0016021                             | F:phospho-N-acetylmuramoyl-pentapeptide-transferase activity; C:integral component of membrane                                                                                   |
| Eucgr_D00301                 | K02955 - small subunit ribosomal protein S14e (RP-S14e, RPS14) (1 of 3) OS=Egrandis                                            | F:GO:0003735;<br>C:GO:0005840;<br>P:GO:0006412;<br>F:GO:0004497;<br>F:GO:0005506;<br>C:GO:0016021;<br>F:GO:0016705;<br>F:GO:0020037;<br>P:GO:0055114                  | F:structural constituent of ribosome; C:ribosome; P:translation                                                                                                                                                                                                          |                                        |                                                                                                                                  | no IPS match                                                                                                                                                                                                                                     | no IPS match                                           | no IPS match                                                                                                                                                                     |
| Eucgr_D00302                 | K09832 - cytochrome P450, family 710, subfamily A (CYP710A) (1 of 1) OS=Egrandis                                               | F:GO:0003723;<br>C:GO:0005634;<br>P:GO:0006396;<br>C:GO:1990994                                                                                                       | F:monoxygenase activity; F:iron ion binding; C:integral component of membrane; F:oxidoreductase activity, acting on paired donors, with incorporation or reduction of molecular oxygen; F:heme binding; P:oxidation-reduction process                                    |                                        |                                                                                                                                  | IPR036396 (G3DSA:1.10.630.GENE3D);<br>PTHR24286 (PANTHER);<br>PTHR24286-SF0 (PANTHER);<br>IPR036396 (SUPERFAMILY)                                                                                                                                | F:GO:0005506; F:GO:0016705; F:GO:0020037; P:GO:0055114 | F:oxidoreductase activity, acting on paired donors, with incorporation or reduction of molecular oxygen; F:heme binding; P:oxidation-reduction process                           |
| Eucgr_D00303                 | PTHR10052/PTHR10052-SF9 - 60S RIBOSOMAL PROTEIN L18A // SUBFAMILY NOT NAMED (1 of 6) OS=Egrandis                               | C:GO:0016021                                                                                                                                                          | C:integral component of membrane                                                                                                                                                                                                                                         |                                        |                                                                                                                                  | mobdb-lite (MOBIDB_LITE)                                                                                                                                                                                                                         | no GO terms                                            | no GO terms                                                                                                                                                                      |
| Eucgr_D00304                 | K02882 - large subunit ribosomal protein L18Ac (RP-L18Ac, RPL18A) (1 of 2) OS=Egrandis                                         | F:GO:0003735;<br>C:GO:0005840;<br>P:GO:0006412                                                                                                                        | F:structural constituent of ribosome; C:ribosome; P:translation                                                                                                                                                                                                          |                                        |                                                                                                                                  | IPR023573 (PFAM); G3DSA:3.10.20.10 (GENE3D); IPR028877 (PANTHER);<br>PTHR10052-SF19 (PANTHER);<br>IPR028877 (HAMARY); SSF160374 (SUPERFAMILY)                                                                                                    | F:GO:0003735; C:GO:0005840; P:GO:0006412               | F:structural constituent of ribosome; C:ribosome; P:translation                                                                                                                  |
| Eucgr_D00305                 | PTHR11712-SF226 - 3-OXOACYL-[ACYL-CARRIER-PROTEIN] SYNTHASE I, CHLOROPLASTIC (1 of 1) OS=Egrandis                              | P:GO:0006633;<br>F:GO:0016747;<br>F:GO:0003677;<br>C:GO:0005634                                                                                                       | P:fatty acid biosynthetic process; F:transferase activity, transferring acyl groups other than amino-acyl groups                                                                                                                                                         |                                        |                                                                                                                                  | IPR014030 (PFAM); IPR016039 (G3DSA:3.40.47.GENE3D);<br>PTHR11712-SF226 (PANTHER);<br>PTHR11712 (PANTHER); IPR016039 (SUPERFAMILY)                                                                                                                | F:GO:0003824                                           | F:catalytic activity                                                                                                                                                             |
| Eucgr_D00306                 | PTHR13711-SF200 - HIGH MOBILITY GROUP B PROTEIN 14 (1 of 1) OS=Egrandis                                                        | F:GO:0003824;<br>C:GO:0016021                                                                                                                                         | F:DNA binding; C:nucleus                                                                                                                                                                                                                                                 |                                        |                                                                                                                                  | no IPS match                                                                                                                                                                                                                                     | no IPS match                                           | no IPS match                                                                                                                                                                     |
| Eucgr_D00307<br>Eucgr_D00308 | 5.3.1.27 - 6-phospho-3-hexuloisomerase / Phospho-3-hexuloisomerase (1 of 2) OS=Egrandis<br>uncharacterized protein OS=Egrandis | F:GO:0003824;<br>C:GO:0016021                                                                                                                                         | F:catalytic activity; C:integral component of membrane                                                                                                                                                                                                                   |                                        |                                                                                                                                  | no IPS match<br>no IPS match                                                                                                                                                                                                                     | no IPS match<br>no IPS match                           | no IPS match<br>no IPS match                                                                                                                                                     |
| Eucgr_D00309                 | PTHR32468-SF17 - CATION/H(+) ANTIporter 10-RELATED (1 of 2) OS=Egrandis                                                        | F:GO:0015299;<br>C:GO:0016021;<br>P:GO:1902600                                                                                                                        | F:solute/proton antiporter activity; C:integral component of membrane; P:proton transmembrane transport                                                                                                                                                                  |                                        |                                                                                                                                  | IPR006153 (PFAM); IPR038770 (G3DSA:1.20.1530.GENE3D);<br>PTHR32468-SF17 (PANTHER);<br>PTHR32468 (PANTHER)                                                                                                                                        | P:GO:0006812; F:GO:0015299; C:GO:0016021; P:GO:0055085 | P:cation transport; F:solute/proton antiporter activity; C:integral component of membrane; P:transmembrane transport                                                             |
| Eucgr_D00310                 | K00654 - serine palmitoyltransferase (SPT) (1 of 1) OS=Egrandis                                                                | F:GO:0005506;<br>F:GO:0009055;<br>P:GO:0009058;<br>C:GO:0009535;<br>C:GO:0009539;<br>P:GO:0009767;<br>C:GO:0016021;<br>F:GO:0020037;<br>F:GO:0030170                  | F:iron ion binding; F:electron transfer activity; P:biosynthetic process; C:chloroplast thylakoid membrane; C:photosystem II reaction center; P:photosynthetic electron transport chain; C:integral component of membrane; F:heme binding; F:pyridoxal phosphate binding |                                        |                                                                                                                                  | no IPS match                                                                                                                                                                                                                                     | no IPS match                                           | no IPS match                                                                                                                                                                     |
| Eucgr_D00311                 | PTHR11945-SF229 - F23H11.23 PROTEIN-RELATED (1 of 4) OS=Egrandis                                                               | F:GO:0000977;<br>C:GO:0005634;<br>P:GO:0045944;<br>F:GO:0046983                                                                                                       | F:RNA polymerase II regulatory region sequence-specific DNA binding; C:nucleus; P:positive regulation of transcription by RNA polymerase II; F:protein dimerization activity                                                                                             |                                        |                                                                                                                                  | IPR002100 (PRINTS); IPR002100 (SMART); IPR021000 (PFAM);<br>IPR036879 (G3DSA:3.40.1810.GENE3D); mobdb-lite (MOBIDB_LITE); PTHR11945 (PANTHER); PTHR11945-SF229 (PANTHER); IPR002100 (PROSITE_PROFILES); IPR033896 (CDD); IPR036879 (SUPERFAMILY) | F:GO:0000977; F:GO:0003677; P:GO:0045944; F:GO:0046983 | F:RNA polymerase II regulatory region sequence-specific DNA binding; F:DNA binding; P:positive regulation of transcription by RNA polymerase II; F:protein dimerization activity |
| Eucgr_D00312                 | PTHR11945-SF229 - F23H11.23 PROTEIN-RELATED (1 of 4) OS=Egrandis                                                               | F:GO:0000977;<br>C:GO:0005634;<br>P:GO:0045944;<br>F:GO:0046983                                                                                                       | F:RNA polymerase II regulatory region sequence-specific DNA binding; C:nucleus; P:positive regulation of transcription by RNA polymerase II; F:protein dimerization activity                                                                                             |                                        |                                                                                                                                  | IPR002100 (PRINTS); IPR002100 (SMART); IPR021000 (PFAM);<br>IPR036879 (G3DSA:3.40.1810.GENE3D); mobdb-lite (MOBIDB_LITE); PTHR11945 (PANTHER); PTHR11945-SF229 (PANTHER); IPR002100 (PROSITE_PROFILES); IPR033896 (CDD); IPR036879 (SUPERFAMILY) | F:GO:0000977; F:GO:0003677; P:GO:0045944; F:GO:0046983 | F:RNA polymerase II regulatory region sequence-specific DNA binding; F:DNA binding; P:positive regulation of transcription by RNA polymerase II; F:protein dimerization activity |
| Eucgr_D00313                 | PTHR11945-SF229 - F23H11.23 PROTEIN-RELATED (1 of 4) OS=Egrandis                                                               | F:GO:0000977;<br>C:GO:0005634;<br>P:GO:0045944;<br>F:GO:0046983                                                                                                       | F:RNA polymerase II regulatory region sequence-specific DNA binding; C:nucleus; P:positive regulation of transcription by RNA polymerase II; F:protein dimerization activity                                                                                             |                                        |                                                                                                                                  | IPR002100 (PRINTS); IPR002100 (SMART); IPR021000 (PFAM);<br>IPR036879 (G3DSA:3.40.1810.GENE3D); mobdb-lite (MOBIDB_LITE); PTHR11945 (PANTHER); PTHR11945-SF229 (PANTHER); IPR002100 (PROSITE_PROFILES); IPR033896 (CDD); IPR036879 (SUPERFAMILY) | F:GO:0000977; F:GO:0003677; P:GO:0045944; F:GO:0046983 | F:RNA polymerase II regulatory region sequence-specific DNA binding; F:DNA binding; P:positive regulation of transcription by RNA polymerase II; F:protein dimerization activity |
| Eucgr_D00314                 | K10735 - GINS complex subunit 4 (GINS4, SLD5) (1 of 1) OS=Egrandis                                                             | P:GO:0006261                                                                                                                                                          | C:nucleus; P:DNA-dependent DNA replication                                                                                                                                                                                                                               |                                        |                                                                                                                                  | G3DSA:1.20.58.1030 (GENE3D);<br>IPR036224 (SUPERFAMILY)                                                                                                                                                                                          | no GO terms                                            | no GO terms                                                                                                                                                                      |



|              |                                                                                                                |                                                                                                                    |                                                                                                                                                                                                    |             |                           |                                                                                                                                                                                                                                                                                                                                                                                                                                                                                                                                                                                             |                                                          |                                                                                                                                     |
|--------------|----------------------------------------------------------------------------------------------------------------|--------------------------------------------------------------------------------------------------------------------|----------------------------------------------------------------------------------------------------------------------------------------------------------------------------------------------------|-------------|---------------------------|---------------------------------------------------------------------------------------------------------------------------------------------------------------------------------------------------------------------------------------------------------------------------------------------------------------------------------------------------------------------------------------------------------------------------------------------------------------------------------------------------------------------------------------------------------------------------------------------|----------------------------------------------------------|-------------------------------------------------------------------------------------------------------------------------------------|
| Eucgr_D00315 | K09647 - mitochondrial inner membrane protease subunit 1 (IMP1) (1 of 3) OS=Egrandis                           | P:GO:0006508;<br>F:GO:0008236;<br>C:GO:0016021                                                                     | P:proteolysis; F:serine-type peptidase activity; C:integral component of membrane                                                                                                                  |             |                           | G3DSA:2.10.109.10 (GENE3D);<br>IPR015927 (PFAM); PTHR12383<br>(PANTHER); PTHR12383-SF29<br>(PANTHER); cd06539 (CDD);<br>IPR036286 (SUPERFAMILY)                                                                                                                                                                                                                                                                                                                                                                                                                                             | no GO terms                                              | no GO terms                                                                                                                         |
| Eucgr_D00316 | PTHR30620/PTHR30620-SF30 - PERIPLASMIC BETA-GLUCOSIDASE-RELATED //<br>SUBFAMILY NOT NAMED (1 of 2) OS=Egrandis | F:GO:0004553;<br>P:GO:0005975                                                                                      | F:hydrolase activity, hydrolyzing O-glycosyl compounds; P:carbohydrate metabolic process                                                                                                           |             |                           | IPR026891 (SMART); IPR013783<br>(G3DSA:2.60.40.GENE3D); IPR026891<br>(PFAM); IPR036881<br>(G3DSA:3.40.50.GENE3D); PTHR42721<br>(PANTHER); PTHR42721-SF11<br>(PANTHER); IPR036881<br>(SUPERFAMILY)                                                                                                                                                                                                                                                                                                                                                                                           | F:GO:0004553; P:GO:0005975                               | F:hydrolase activity, hydrolyzing O-<br>glycosyl compounds;<br>P:carbohydrate metabolic process                                     |
| Eucgr_D00317 | PTHR12565-SF155 - TRANSCRIPTION FACTOR BHLH144 (1 of 1) OS=Egrandis                                            | P:GO:0006355;<br>F:GO:0046983                                                                                      | P:regulation of transcription, DNA-templated; F:protein dimerization activity                                                                                                                      |             |                           | mobdb-lite (MOBIDB_LITE); mobdb-<br>lite (MOBIDB_LITE); IPR024097<br>(PANTHER); PTHR12565-SF155<br>(PANTHER); IPR011598<br>(PROSITE_PROFILES); IPR036638<br>(SUPERFAMILY)                                                                                                                                                                                                                                                                                                                                                                                                                   | P:GO:0006355; F:GO:0046983                               | P:regulation of transcription, DNA-<br>templated; F:protein dimerization<br>activity                                                |
| Eucgr_D00318 | PTHR27000-SF16 - LRR RECEPTOR-LIKE SERINE/THREONINE-PROTEIN KINASE FLS2 (1 of<br>3) OS=Egrandis                | F:GO:0004672;<br>F:GO:0005515;<br>F:GO:0005524;<br>P:GO:000468;<br>C:GO:0016021                                    | F:protein kinase activity; F:protein binding; F:ATP binding; P:protein phosphorylation; C:integral component of membrane                                                                           |             |                           | PR00019 (PRINTS); SM00365<br>(SMART); IPR003591 (SMART);<br>IPR000719 (SMART);<br>G3DSA:1.10.510.10 (GENE3D);<br>IPR001611 (PFAM); IPR000719<br>(PFAM); IPR013210 (PFAM);<br>G3DSA:3.30.200.20 (GENE3D);<br>IPR032675 (G3DSA:3.80.10.GENE3D);<br>IPR032675 (G3DSA:3.80.10.GENE3D);<br>IPR032675 (G3DSA:3.80.10.GENE3D);<br>IPR032675 (G3DSA:3.80.10.GENE3D);<br>IPR001611 (PFAM); IPR032675<br>(G3DSA:3.80.10.GENE3D); PTHR43887<br>(PANTHER); IPR000719<br>(PROSITE_PROFILES); IPR011009<br>(SUPERFAMILY); SSF52047<br>(SUPERFAMILY); SSF52058<br>(SUPERFAMILY); SSF52058<br>(SUPERFAMILY) | F:GO:0004672; F:GO:0005515;<br>F:GO:0005524; P:GO:000468 | F:protein kinase activity; F:protein<br>binding; F:ATP binding; P:protein<br>phosphorylation                                        |
| Eucgr_D00319 | K08912 - light-harvesting complex II chlorophyll a/b binding protein 1 (LHCB1) (1 of 5)<br>OS=Egrandis         | C:GO:0009522;<br>C:GO:0009523;<br>C:GO:0009535;<br>P:GO:0009765;<br>C:GO:0016021;<br>F:GO:0016168;<br>P:GO:0018298 | C:photosystem I; C:photosystem II; C:chloroplast thylakoid membrane; P:photosynthesis, light harvesting; C:integral component of membrane; F:chlorophyll<br>binding; P:protein-chromophore linkage |             |                           | IPR023329<br>(G3DSA:1.10.3460.GENE3D);<br>IPR022796 (PFAM); mobdb-lite<br>(MOBIDB_LITE); IPR001344<br>(PANTHER); PTHR21649-SF55<br>(PANTHER); SSF103511<br>(SUPERFAMILY)                                                                                                                                                                                                                                                                                                                                                                                                                    | P:GO:0009765; C:GO:0016020                               | P:photosynthesis, light harvesting;<br>C:membrane                                                                                   |
| Eucgr_D00320 | K08912 - light-harvesting complex II chlorophyll a/b binding protein 1 (LHCB1) (1 of 5)<br>OS=Egrandis         | C:GO:0009522;<br>C:GO:0009523;<br>C:GO:0009535;<br>P:GO:0009765;<br>C:GO:0016021;<br>F:GO:0016168;<br>P:GO:0018298 | C:photosystem I; C:photosystem II; C:chloroplast thylakoid membrane; P:photosynthesis, light harvesting; C:integral component of membrane; F:chlorophyll<br>binding; P:protein-chromophore linkage |             |                           | IPR023329<br>(G3DSA:1.10.3460.GENE3D);<br>IPR022796 (PFAM); mobdb-lite<br>(MOBIDB_LITE); PTHR21649-SF55<br>(PANTHER); IPR001344 (PANTHER);<br>SSF103511 (SUPERFAMILY)                                                                                                                                                                                                                                                                                                                                                                                                                       | P:GO:0009765; C:GO:0016020                               | P:photosynthesis, light harvesting;<br>C:membrane                                                                                   |
| Eucgr_D00321 | K08912 - light-harvesting complex II chlorophyll a/b binding protein 1 (LHCB1) (1 of 5)<br>OS=Egrandis         | C:GO:0009522;<br>C:GO:0009523;<br>C:GO:0009535;<br>P:GO:0009765;<br>C:GO:0016021;<br>F:GO:0016168;<br>P:GO:0018298 | C:photosystem I; C:photosystem II; C:chloroplast thylakoid membrane; P:photosynthesis, light harvesting; C:integral component of membrane; F:chlorophyll<br>binding; P:protein-chromophore linkage |             |                           | IPR023329<br>(G3DSA:1.10.3460.GENE3D);<br>IPR022796 (PFAM); IPR001344<br>(PANTHER); PTHR21649-SF55<br>(PANTHER); SSF103511<br>(SUPERFAMILY)                                                                                                                                                                                                                                                                                                                                                                                                                                                 | P:GO:0009765; C:GO:0016020                               | P:photosynthesis, light harvesting;<br>C:membrane                                                                                   |
| Eucgr_D00322 | K08912 - light-harvesting complex II chlorophyll a/b binding protein 1 (LHCB1) (1 of 5)<br>OS=Egrandis         | C:GO:0009522;<br>C:GO:0009523;<br>C:GO:0009535;<br>P:GO:0009765;<br>C:GO:0016021;<br>F:GO:0016168;<br>P:GO:0018298 | C:photosystem I; C:photosystem II; C:chloroplast thylakoid membrane; P:photosynthesis, light harvesting; C:integral component of membrane; F:chlorophyll<br>binding; P:protein-chromophore linkage |             |                           | IPR023329<br>(G3DSA:1.10.3460.GENE3D);<br>IPR022796 (PFAM); mobdb-lite<br>(MOBIDB_LITE); IPR001344<br>(PANTHER); PTHR21649-SF55<br>(PANTHER); SSF103511<br>(SUPERFAMILY)                                                                                                                                                                                                                                                                                                                                                                                                                    | P:GO:0009765; C:GO:0016020                               | P:photosynthesis, light harvesting;<br>C:membrane                                                                                   |
| Eucgr_D00323 | PTHR12526-SF304 - STARCH SYNTHASE 4, CHLOROPLASTIC/AMYLOPLASTIC-RELATED<br>(1 of 1) OS=Egrandis                | F:GO:0004373                                                                                                       | F:glycogen (starch) synthase activity                                                                                                                                                              | EC:2.4.1.11 | Glycogen(starch) synthase | no IPS match                                                                                                                                                                                                                                                                                                                                                                                                                                                                                                                                                                                | no IPS match                                             | no IPS match                                                                                                                        |
| Eucgr_D00324 | PTHR31376-SF17 - PURINE PERMEASE 10-RELATED (1 of 8) OS=Egrandis                                               | F:GO:0005215;<br>C:GO:0016021                                                                                      | F:transporter activity; C:integral component of membrane                                                                                                                                           |             |                           | PF16913 (PFAM); PTHR31376-SF17<br>(PANTHER); IPR030182 (PANTHER);<br>SSF103481 (SUPERFAMILY)                                                                                                                                                                                                                                                                                                                                                                                                                                                                                                | F:GO:0005215; C:GO:0016021                               | F:transporter activity; C:integral<br>component of membrane                                                                         |
| Eucgr_D00325 | PTHR31376-SF17 - PURINE PERMEASE 10-RELATED (1 of 8) OS=Egrandis                                               | F:GO:0005215;<br>C:GO:0016021                                                                                      | F:transporter activity; C:integral component of membrane                                                                                                                                           |             |                           | PF16913 (PFAM); IPR030182<br>(PANTHER); PTHR31376-SF17<br>(PANTHER)                                                                                                                                                                                                                                                                                                                                                                                                                                                                                                                         | F:GO:0005215; C:GO:0016021                               | F:transporter activity; C:integral<br>component of membrane                                                                         |
| Eucgr_D00326 | PTHR31376-SF17 - PURINE PERMEASE 10-RELATED (1 of 8) OS=Egrandis                                               | F:GO:0005215;<br>C:GO:0016021                                                                                      | F:transporter activity; C:integral component of membrane                                                                                                                                           |             |                           | PF16913 (PFAM); IPR030182<br>(PANTHER); PTHR31376-SF17<br>(PANTHER); SSF103481<br>(SUPERFAMILY)                                                                                                                                                                                                                                                                                                                                                                                                                                                                                             | F:GO:0005215; C:GO:0016021                               | F:transporter activity; C:integral<br>component of membrane                                                                         |
| Eucgr_D00327 | PTHR31376-SF17 - PURINE PERMEASE 10-RELATED (1 of 8) OS=Egrandis                                               | F:GO:0005215;<br>C:GO:0016021                                                                                      | F:transporter activity; C:integral component of membrane                                                                                                                                           |             |                           | PF16913 (PFAM); mobdb-lite<br>(MOBIDB_LITE); PTHR31376-SF17<br>(PANTHER); IPR030182 (PANTHER)                                                                                                                                                                                                                                                                                                                                                                                                                                                                                               | F:GO:0005215; C:GO:0016021                               | F:transporter activity; C:integral<br>component of membrane                                                                         |
| Eucgr_D00328 | PTHR31376-SF17 - PURINE PERMEASE 10-RELATED (1 of 8) OS=Egrandis                                               | F:GO:0005215;<br>C:GO:0016021                                                                                      | F:transporter activity; C:integral component of membrane                                                                                                                                           |             |                           | PF16913 (PFAM); IPR030182<br>(PANTHER); PTHR31376-SF17<br>(PANTHER); SSF103481<br>(SUPERFAMILY)                                                                                                                                                                                                                                                                                                                                                                                                                                                                                             | F:GO:0005215; C:GO:0016021                               | F:transporter activity; C:integral<br>component of membrane                                                                         |
| Eucgr_D00330 | PTHR31376-SF17 - PURINE PERMEASE 10-RELATED (1 of 8) OS=Egrandis                                               | F:GO:0005215;<br>C:GO:0016021                                                                                      | F:transporter activity; C:integral component of membrane                                                                                                                                           |             |                           | PF16913 (PFAM); IPR030182<br>(PANTHER); PTHR31376-SF17<br>(PANTHER)                                                                                                                                                                                                                                                                                                                                                                                                                                                                                                                         | F:GO:0005215; C:GO:0016021                               | F:transporter activity; C:integral<br>component of membrane                                                                         |
| Eucgr_D00331 | PTHR31376-SF17 - PURINE PERMEASE 10-RELATED (1 of 8) OS=Egrandis                                               | F:GO:0005215;<br>C:GO:0016021                                                                                      | F:transporter activity; C:integral component of membrane                                                                                                                                           |             |                           | PF16913 (PFAM); IPR030182<br>(PANTHER); PTHR31376-SF17<br>(PANTHER); SSF103481<br>(SUPERFAMILY)                                                                                                                                                                                                                                                                                                                                                                                                                                                                                             | F:GO:0005215; C:GO:0016021                               | F:transporter activity; C:integral<br>component of membrane                                                                         |
| Eucgr_D00332 | PTHR31376-SF17 - PURINE PERMEASE 10-RELATED (1 of 8) OS=Egrandis                                               | F:GO:0005215;<br>C:GO:0016021                                                                                      | F:transporter activity; C:integral component of membrane                                                                                                                                           |             |                           | PF16913 (PFAM); IPR030182<br>(PANTHER); PTHR31376-SF17<br>(PANTHER)                                                                                                                                                                                                                                                                                                                                                                                                                                                                                                                         | F:GO:0005215; C:GO:0016021                               | F:transporter activity; C:integral<br>component of membrane                                                                         |
| Eucgr_D00333 | uncharacterized protein OS=Egrandis                                                                            | C:GO:0016021                                                                                                       | C:integral component of membrane                                                                                                                                                                   |             |                           | mobdb-lite (MOBIDB_LITE); mobdb-<br>lite (MOBIDB_LITE); PTHR36715<br>(PANTHER)                                                                                                                                                                                                                                                                                                                                                                                                                                                                                                              | no GO terms                                              | no GO terms                                                                                                                         |
| Eucgr_D00334 | uncharacterized protein OS=Egrandis                                                                            | C:GO:0016021                                                                                                       | C:integral component of membrane                                                                                                                                                                   |             |                           | no IPS match                                                                                                                                                                                                                                                                                                                                                                                                                                                                                                                                                                                | no IPS match                                             | no IPS match                                                                                                                        |
| Eucgr_D00335 | 2.3.1.45 - N-acetylneuraminate 7-O(or 9-O)-acetyltransferase (1 of 2) OS=Egrandis                              | C:GO:0016021                                                                                                       | C:integral component of membrane                                                                                                                                                                   |             |                           | IPR012419 (PFAM); PTHR13533-SF22<br>(PANTHER); PTHR13533 (PANTHER)<br>IPR003657 (SMART); IPR003657<br>(PFAM); IPR036576<br>(G3DSA:2.20.25.GENE3D); PTHR31221<br>(PANTHER); PTHR31221-SF56<br>(PANTHER); IPR003657<br>(PROSITE_PROFILES); IPR036576<br>(SUPERFAMILY)                                                                                                                                                                                                                                                                                                                         | no GO terms                                              | no GO terms                                                                                                                         |
| Eucgr_D00336 | PTHR31221-SF19 - WRKY TRANSCRIPTION FACTOR 28-RELATED (1 of 1) OS=Egrandis                                     | F:GO:0003700;<br>C:GO:0005634;<br>P:GO:0006355;<br>F:GO:0043565                                                    | F:DNA-binding transcription factor activity; C:nucleus; P:regulation of transcription, DNA-templated; F:sequence-specific DNA binding                                                              |             |                           | IPR003280 (PRINTS); IPR013099<br>(PFAM); G3DSA:1.10.287.70<br>(GENE3D); G3DSA:1.10.287.70<br>(GENE3D); mobdb-lite<br>(MOBIDB_LITE); PTHR1003-SF126<br>(PANTHER); PTHR1003 (PANTHER);<br>SSF81324 (SUPERFAMILY); SSF81324<br>(SUPERFAMILY)                                                                                                                                                                                                                                                                                                                                                   | F:GO:0003700; P:GO:0006355;<br>F:GO:0043565              | F:DNA-binding transcription factor<br>activity; P:regulation of<br>transcription, DNA-templated;<br>F:sequence-specific DNA binding |
| Eucgr_D00337 | PTHR11003-SF126 - POTASSIUM INWARD RECTIFIER (KIR)-LIKE CHANNEL 3-RELATED (1<br>of 2) OS=Egrandis              | F:GO:0005267;<br>F:GO:0005509;<br>C:GO:0016021;<br>P:GO:0071805                                                    | F:potassium channel activity; F:calcium ion binding; C:integral component of membrane; P:potassium ion transmembrane transport                                                                     |             |                           | mobdb-lite (MOBIDB_LITE); mobdb-<br>lite (MOBIDB_LITE)                                                                                                                                                                                                                                                                                                                                                                                                                                                                                                                                      | F:GO:0005267; C:GO:0016020;<br>P:GO:0071805              | F:potassium channel activity;<br>C:membrane; P:potassium ion<br>transmembrane transport                                             |
| Eucgr_D00338 | K14801 - pre-rRNA-processing protein TSR4 (TSR4) (1 of 3) OS=Egrandis                                          | C:GO:005737;<br>F:GO:0046872                                                                                       | C:cytoplasm; F:metal ion binding                                                                                                                                                                   |             |                           | mobdb-lite (MOBIDB_LITE); mobdb-<br>lite (MOBIDB_LITE)                                                                                                                                                                                                                                                                                                                                                                                                                                                                                                                                      | no GO terms                                              | no GO terms                                                                                                                         |
| Eucgr_D00339 | PTHR21535-SF49 - MAGNESIUM TRANSPORTER CORA-LIKE FAMILY PROTEIN (1 of 3)<br>OS=Egrandis                        | C:GO:0016021;<br>P:GO:0030001;<br>F:GO:0046873;<br>P:GO:0055085                                                    | C:integral component of membrane; P:metal ion transport; F:metal ion transmembrane transporter activity; P:transmembrane transport                                                                 |             |                           | mobdb-lite (MOBIDB_LITE); mobdb-<br>lite (MOBIDB_LITE); mobdb-lite<br>(MOBIDB_LITE); PTHR21535-SF50<br>(PANTHER); PTHR21535 (PANTHER)                                                                                                                                                                                                                                                                                                                                                                                                                                                       | no GO terms                                              | no GO terms                                                                                                                         |
